# Supplementary material
Source: PubMed Central journal article supplement (PMC3318757)
Supplement: supp_M111.316059_jbc.M111.316059-1.pdf [file supp_M111.316059_jbc.M111.316059-1.pdf]

Table S1. Primers used for RT-PCR

| <b>Gene</b>                       | <b>Orientation</b> | <b>Primer Sequence</b>   |
|-----------------------------------|--------------------|--------------------------|
| <b><math>\beta</math>-tubulin</b> | forward            | atgCGtgaaatagTtcatatcc   |
|                                   | reverse            | ttagatttcttctcctcgtc     |
| <b>TMT-1</b>                      | forward            | atgggattggatctcctttcaacg |
|                                   | reverse            | tcacttgggcttctcaaagatgag |
| <b>TMT-2</b>                      | forward            | atggcagtagattgctttcgatc  |
|                                   | reverse            | tcattctggcttctggaagatcag |
| <b>TMT-3</b>                      | forward            | atggccctggatcttcttcatcc  |
|                                   | reverse            | ttactctggcttttgaagatc    |
