# Supplementary material
Source: PubMed Central journal article supplement (PMC3318757)
Supplement: supp_M111.316059_jbc.M111.316059-2.pdf [file supp_M111.316059_jbc.M111.316059-2.pdf]

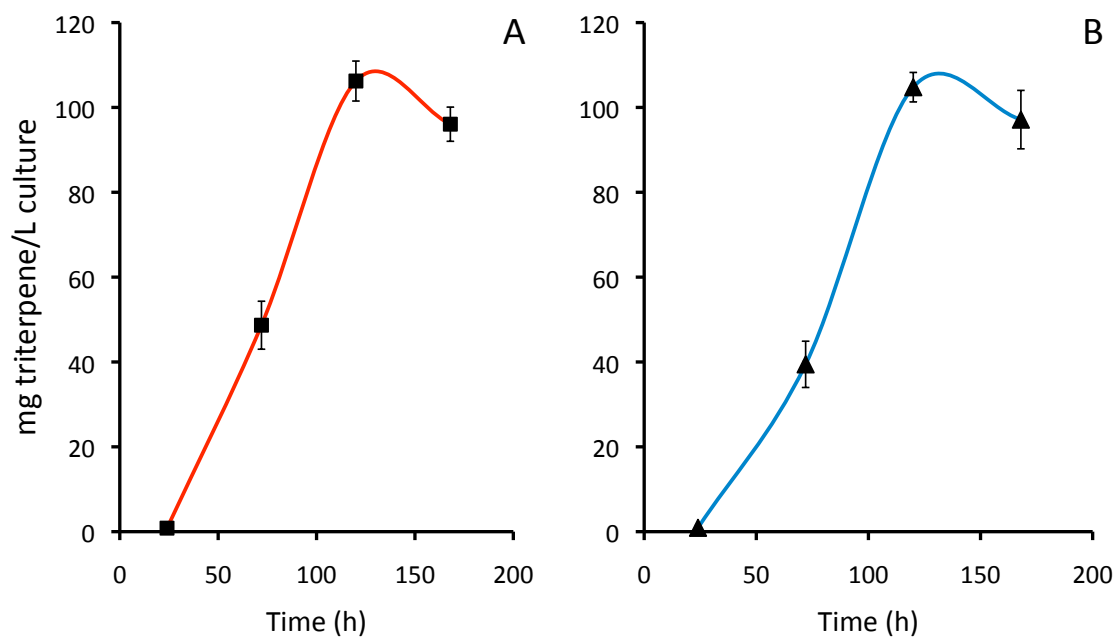

**FIGURE S1.** Accumulation of triterpenes in yeast engineered with various triterpene synthases. Yeast line TN-7 was engineered with either *B. braunii* squalene synthase (A) or SSL-1-3m (B) and accumulation of squalene (squares), or botryococcene (triangles) measured. Yeast were grown in selection media in shake flasks at 30°C for the indicated time and organic extracts analyzed by GC-MS. Data represents mean  $\pm$  S.E.M.
