# Supplementary material
Source: PubMed Central journal article supplement (PMC3318757)
Supplement: supp_M111.316059_jbc.M111.316059-3.pdf [file supp_M111.316059_jbc.M111.316059-3.pdf]

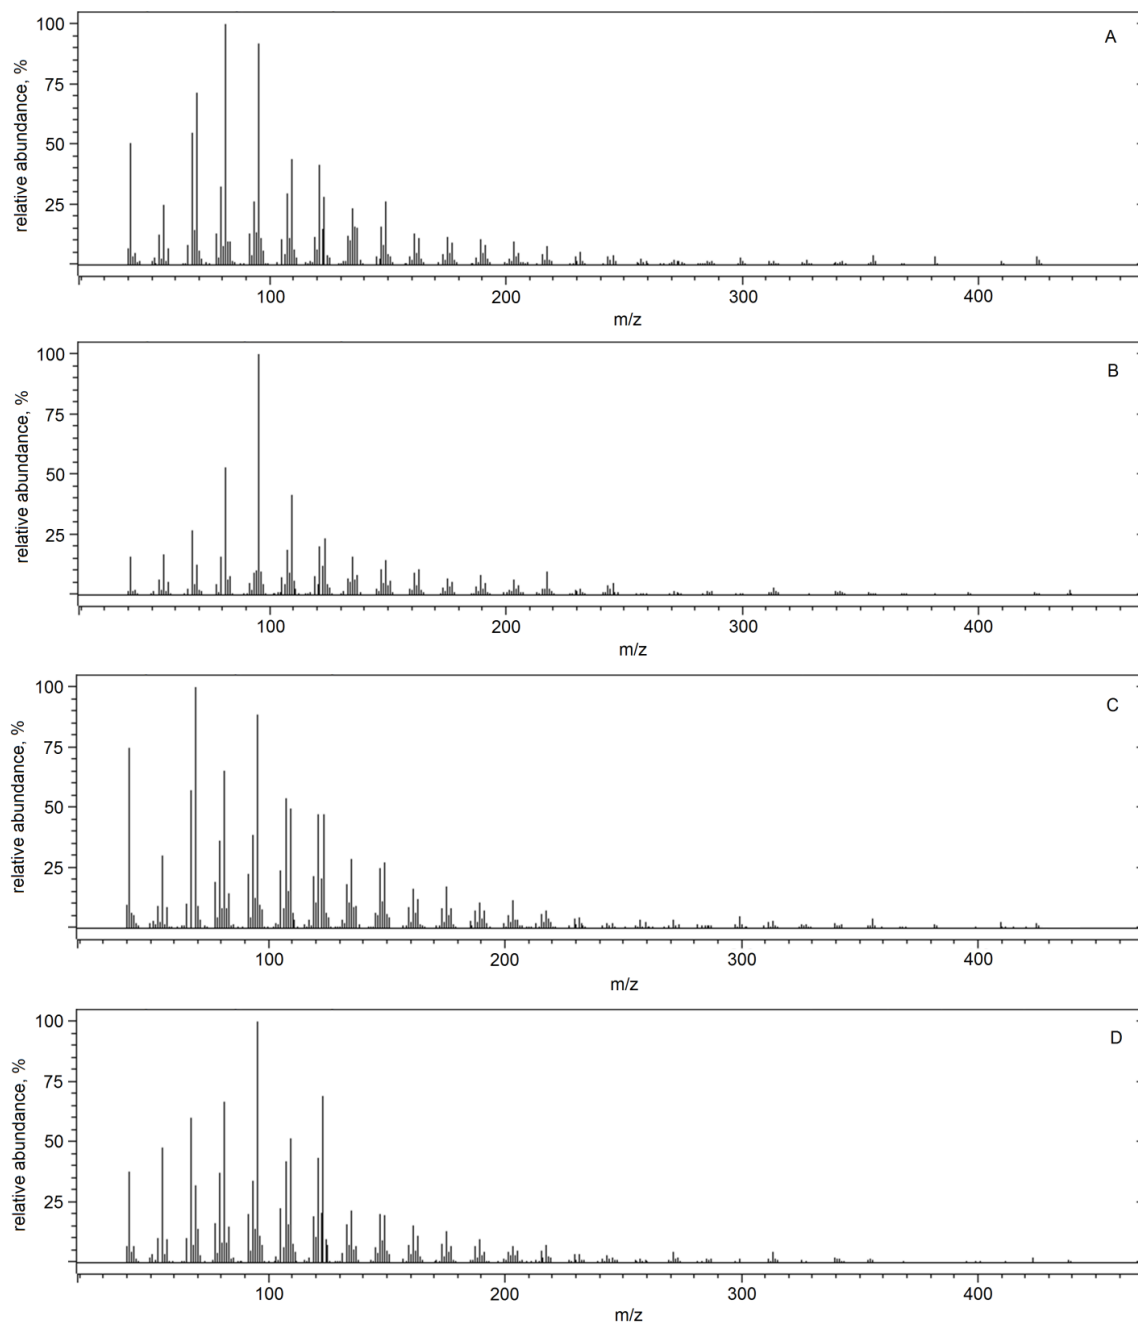

**FIGURE S2.** Mass spectra of C31 squalene (A) and C32 squalene (B) produced in TN7 yeast expressing BSS and TMT-1, TMT-2 or TMT-3, C31 botryococcene (C) produced in TN7 yeast expressing SSL-1-3m and TMT-1, TMT-2 or TMT-3, and C32 botryococcene (D) produced in TN7 yeast expressing SSL-1-3m and TMT-3.
