# Supplementary material
Source: PubMed Central journal article supplement (PMC3318757)
Supplement: supp_M111.316059_jbc.M111.316059-4.pdf [file supp_M111.316059_jbc.M111.316059-4.pdf]

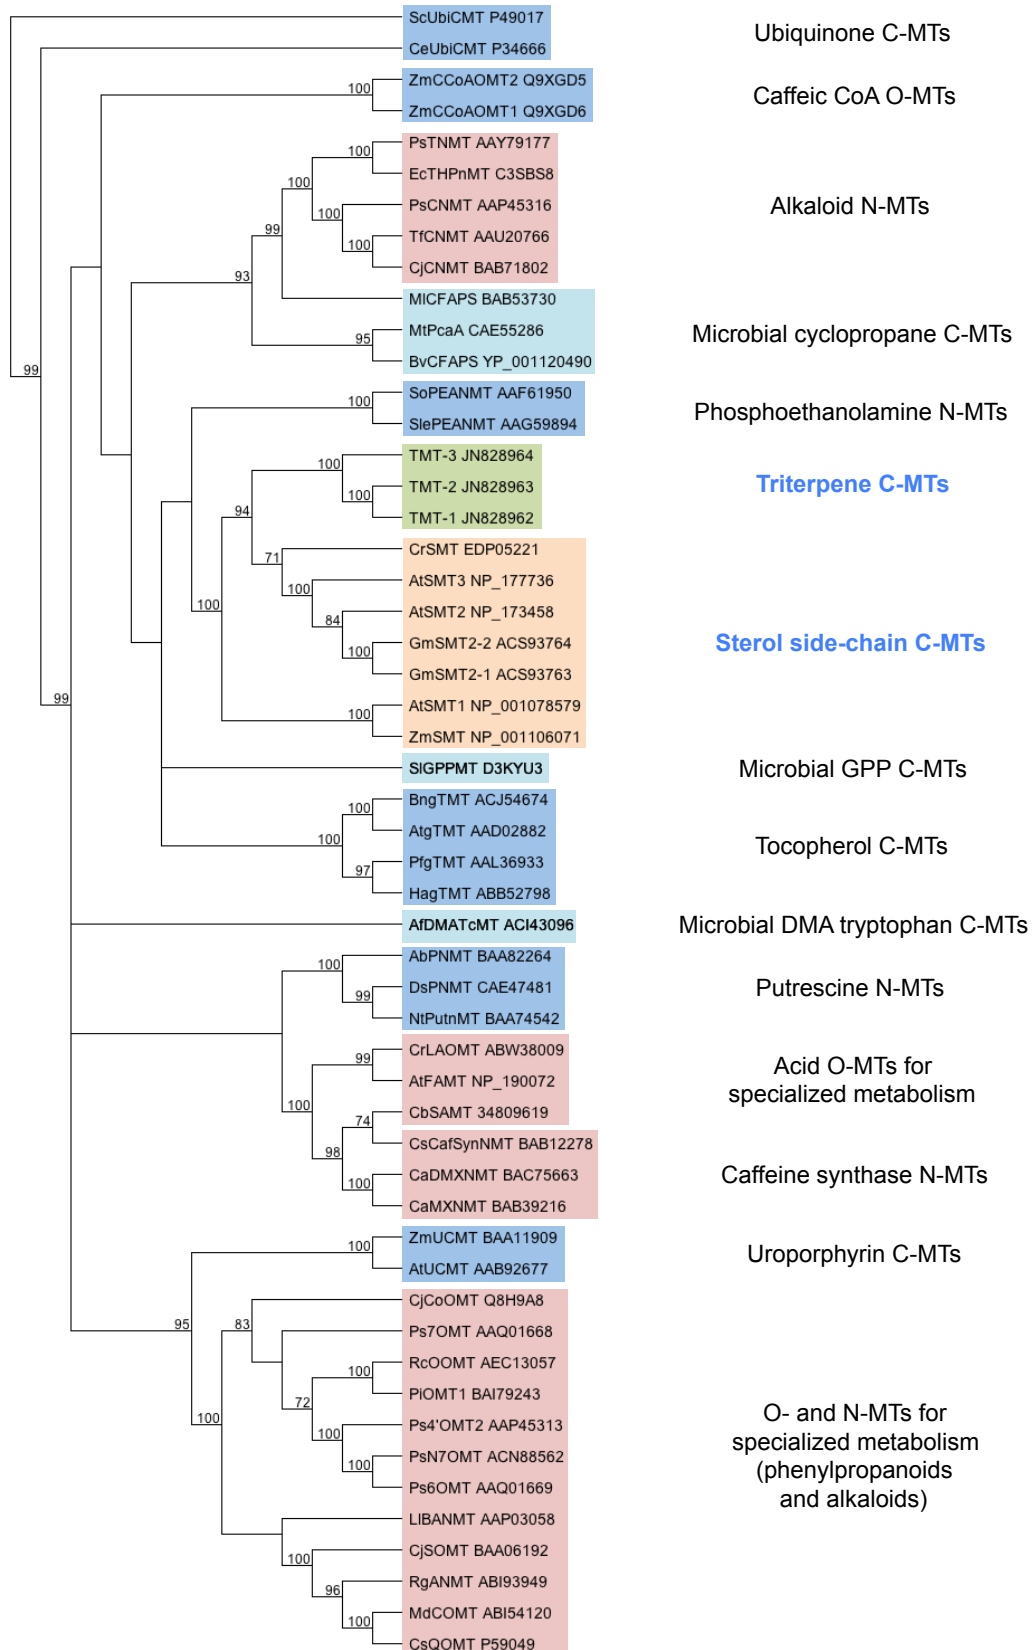

**FIGURE S3.** Phylogenetic relationships for select plant and microbial SAM-dependent methyltransferases. Plant MTs associated with primary metabolism (blue), specialized metabolism (red), and microbial C-MTs (cyan) are aligned relative to sterol MTs (yellow) and the triterpene MTs (green) characterized here. Protein names are abbreviated with the initials for the genus and species, followed by their GenBank accession number and the overall enzyme classification. Adapted from Liscombe et al. (1) and Han et al. (2).

1. Liscombe, D. K., Usera, A. R., and O'Connor, S. E. (2010) *Proceedings of the National Academy of Sciences of the United States of America* **107**, 18793-18798
2. Han, Y., Gasic, K., and Korban, S. S. (2007) *Genetics* **176**, 2625-2635
