# Supplementary material
Source: PubMed Central journal article supplement (PMC3318757)
Supplement: supp_M111.316059_jbc.M111.316059-5.pdf [file supp_M111.316059_jbc.M111.316059-5.pdf]

**Table S2.** NMR Assignments for *In Vivo* Produced Methylated Triterpenes <sup>1</sup>

| C31a botryococcene by TMT3 |          | C31b botryococcene by TMT3 |          | C32 botryococcene by TMT3 |          | C31 squalene by TMT1 |          | C32 squalene by TMT1 |          | C31 squalene by TMT2 |          | C32 squalene by TMT2 |          | C31 squalene by TMT3 |          | C32 squalene by TMT3 |          |
|----------------------------|----------|----------------------------|----------|---------------------------|----------|----------------------|----------|----------------------|----------|----------------------|----------|----------------------|----------|----------------------|----------|----------------------|----------|
| C positions                | $\delta$ | C positions                | $\delta$ | C positions               | $\delta$ | C positions          | $\delta$ | C positions          | $\delta$ | C positions          | $\delta$ | C positions          | $\delta$ | C positions          | $\delta$ | C positions          | $\delta$ |
| 1                          | 17.78    | 1                          | 109.44   | 1                         | 109.44   | 1                    | 109.46   | 1                    | 109.46   | 1                    | 109.46   | 1                    | 109.45   | 1                    | 109.45   | 1                    | 109.46   |
| 2                          | 131.37   | 2                          | 150.24   | 2                         | 150.23   | 2                    | 150.25   | 2                    | 150.23   | 2                    | 150.26   | 2                    | 150.25   | 2                    | 150.25   | 2                    | 150.25   |
| 3                          | 124.47   | 3                          | 40.82    | 3                         | 40.79    | 3                    | 40.79    | 3                    | 40.79    | 3                    | 40.79    | 3                    | 40.79    | 3                    | 40.79    | 3                    | 40.79    |
| 4                          | 26.82    | 4                          | 33.44    | 4                         | 33.44    | 4                    | 33.42    | 4                    | 33.43    | 4                    | 33.43    | 4                    | 33.42    | 4                    | 33.43    | 4                    | 33.42    |
| 5                          | 39.81    | 5                          | 37.58    | 5                         | 37.58    | 5                    | 37.59    | 5                    | 37.61    | 5                    | 37.59    | 5                    | 37.59    | 5                    | 37.60    | 5                    | 37.60    |
| 6                          | 134.76   | 6                          | 135.07   | 6                         | 135.07   | 6                    | 134.99a  | 6                    | 135.15f  | 6                    | 134.99a  | 6                    | 135.17f  | 6                    | 134.99a  | 6                    | 135.16f  |
| 7                          | 124.91   | 7                          | 124.80   | 7                         | 124.70   | 7                    | 124.49b  | 7                    | 124.19   | 7                    | 124.49b  | 7                    | 124.18   | 7                    | 124.49b  | 7                    | 124.18   |
| 8                          | 23.20    | 8                          | 23.20    | 8                         | 23.19    | 8                    | 26.85    | 8                    | 26.73    | 8                    | 26.85    | 8                    | 26.71    | 8                    | 26.86    | 8                    | 26.73    |
| 9                          | 41.41    | 9                          | 41.45    | 9                         | 41.45    | 9                    | 39.84    | 9                    | 39.86    | 9                    | 39.84    | 9                    | 39.86    | 9                    | 39.84    | 9                    | 39.86    |
| 10                         | 42.12    | 10                         | 42.12    | 10                        | 42.11    | 10                   | 135.19a  | 10                   | 135.25f  | 10                   | 135.19a  | 10                   | 135.25f  | 10                   | 135.19a  | 10                   | 135.26f  |
| 11                         | 135.91   | 11                         | 135.89   | 11                        | 135.91   | 11                   | 124.40b  | 11                   | 124.41   | 11                   | 124.40b  | 11                   | 124.40   | 11                   | 124.40b  | 11                   | 124.40   |
| 12                         | 133.82   | 12                         | 133.84   | 12                        | 133.82   | 12                   | 28.36    | 12                   | 28.37    | 12                   | 28.36    | 12                   | 28.35    | 12                   | 28.36    | 12                   | 28.36    |
| 13                         | 36.84    | 13                         | 36.77    | 13                        | 36.84    | 13                   | 28.36    | 13                   | 28.37    | 13                   | 28.36    | 13                   | 28.35    | 13                   | 28.36    | 13                   | 28.36    |
| 14                         | 37.51    | 14                         | 37.46    | 14                        | 37.51    | 14                   | 124.40b  | 14                   | 124.41   | 14                   | 124.40b  | 14                   | 124.40   | 14                   | 124.40b  | 14                   | 124.40   |
| 15                         | 25.92    | 15                         | 25.90    | 15                        | 25.92    | 15                   | 135.17a  | 15                   | 135.25f  | 15                   | 135.17a  | 15                   | 135.25f  | 15                   | 135.17a  | 15                   | 135.26f  |
| 16                         | 124.58   | 16                         | 124.69   | 16                        | 124.58   | 16                   | 39.81c   | 16                   | 39.86    | 16                   | 39.81c   | 16                   | 39.86    | 16                   | 39.81c   | 16                   | 39.86    |
| 17                         | 37.62    | 17                         | 39.81    | 17                        | 35.11    | 17                   | 26.74d   | 17                   | 26.73    | 17                   | 26.74d   | 17                   | 26.71    | 17                   | 26.75d   | 17                   | 26.73    |
| 18                         | 37.82    | 18                         | 39.81    | 18                        | 37.62    | 18                   | 124.36   | 18                   | 124.19   | 18                   | 124.36   | 18                   | 124.18   | 18                   | 124.36   | 18                   | 124.18   |
| 19                         | 33.44    | 19                         | 26.82    | 19                        | 33.42    | 19                   | 135.25a  | 19                   | 135.15f  | 19                   | 135.25a  | 19                   | 135.17f  | 19                   | 135.25a  | 19                   | 135.16f  |
| 20                         | 40.82    | 20                         | 124.50   | 20                        | 40.84    | 20                   | 39.81c   | 20                   | 37.61    | 20                   | 39.81c   | 20                   | 37.59    | 20                   | 39.81c   | 20                   | 37.60    |
| 21                         | 150.27   | 21                         | 131.34   | 21                        | 150.23   | 21                   | 26.72d   | 21                   | 33.43    | 21                   | 26.72d   | 21                   | 33.42    | 21                   | 26.72d   | 21                   | 33.42    |
| 22                         | 109.44   | 22                         | 17.78    | 22                        | 109.44   | 22                   | 124.19   | 22                   | 40.79    | 22                   | 124.19   | 22                   | 40.79    | 22                   | 124.19   | 22                   | 40.79    |
| 23                         | 25.79    | 23                         | 19.06    | 23                        | 19.04    | 23                   | 131.34   | 23                   | 150.23   | 23                   | 150.23   | 23                   | 150.26   | 23                   | 150.26   | 23                   | 150.25   |
| 24                         | 16.00    | 24                         | 16.00    | 24                        | 16.00    | 24                   | 17.76    | 24                   | 109.46   | 24                   | 17.76    | 24                   | 109.45   | 24                   | 109.46   | 24                   | 109.46   |
| 25                         | 23.63    | 25                         | 23.63    | 25                        | 23.62    | 25                   | 19.03    | 25                   | 19.03    | 25                   | 19.03    | 25                   | 19.04    | 25                   | 19.03    | 25                   | 19.04    |
| 26                         | 146.85   | 26                         | 146.85   | 26                        | 146.84   | 26                   | 16.09e   | 26                   | 16.08    | 26                   | 16.09e   | 26                   | 16.08g   | 26                   | 16.09e   | 26                   | 16.08g   |
| 27                         | 111.20   | 27                         | 111.20   | 27                        | 111.19   | 27                   | 16.12e   | 27                   | 16.12    | 27                   | 16.13e   | 27                   | 16.12g   | 27                   | 16.12e   | 27                   | 16.12g   |
| 28                         | 21.23    | 28                         | 21.23    | 28                        | 21.23    | 28                   | 16.12e   | 28                   | 16.12    | 28                   | 16.12e   | 28                   | 16.12g   | 28                   | 16.12e   | 28                   | 16.12g   |
| 29                         | 16.07    | 29                         | 16.07    | 29                        | 16.07    | 29                   | 16.09e   | 29                   | 16.08    | 29                   | 16.09e   | 29                   | 16.08g   | 29                   | 16.09e   | 29                   | 16.08g   |
| 30                         | 19.06    | 30                         | 25.79    | 30                        | 19.04    | 30                   | 25.79    | 30                   | 19.03    | 30                   | 25.79    | 30                   | 19.04    | 30                   | 25.79    | 30                   | 19.04    |
| 31                         | 19.76    | 31                         | 19.76    | 31                        | 19.78    | 31                   | 19.76    | 31                   | 19.78    | 31                   | 19.76    | 31                   | 19.76    | 31                   | 19.76    | 31                   | 19.78    |

a, b, c, d, e, f, g: Signals with the same letter may be interchangeable in a same column.

<sup>1</sup>H and <sup>13</sup>C NMR spectra were recorded on a JEOL alpha 600 NMR spectrometer at 300K. Chemical shifts were referenced relative to solvent peaks, namely d<sub>H</sub> 7.24 and d<sub>C</sub> 77.1 for CDCl<sub>3</sub>. Each product was identified as shown in Fig. 4 by referring <sup>13</sup>C chemical shifts for botryococcenes and methylsqualenes to those previously reported (1-4).

1. Aчитов, E., Metzger, P., Rager, M. N., and Largeau, C. (2004) *Phytochemistry* **65**, 3159-3165
2. Huang, Z., and Poulter, C. D. (1989) *Phytochemistry* **28**, 1467-1470
3. Huang, Z., and Poulter, C. D. (1989) *Phytochemistry* **28**, 3043-3046
4. Okada, S., Tonegawa, I., Matsuda, H., Murakami, M., and Yamaguchi, K. (1997) *Tetrahedron* **53**, 11307-11316
